# Supplementary material
Source: PubMed Central journal article supplement (PMC2966085)
Supplement: supp_M110.136192_Supplementary.pdf [file supp_M110.136192_Supplementary.pdf]

**K<sub>v</sub>7-type Channel Currents in Spiral Ganglia Neurons: Involvement in Sensorineural Hearing Loss**

**Ping Lv, Dongguang Wei and Ebenezer N. Yamoah**

Supplementary Figure 1 (S1)

**Effects of linopirdine under reduced extracellular Ca<sup>2+</sup> conditions.** Upper and second panels show apical (A) and basal (B) SGNs in culture with BDNF/NT3 growth factors and reduced bath Ca<sup>2+</sup> (~300 μM). The third and fourth row shows apical (A) and basal SGNs in the presence of 10 μM linopirdine and a cocktail of Ca<sup>2+</sup> channel blockers. TUJ1 = neuronal marker, Apop (apoptosis = TUNEL- positive, DAPI= nuclei stain).

Supplementary figure 1 (S1)

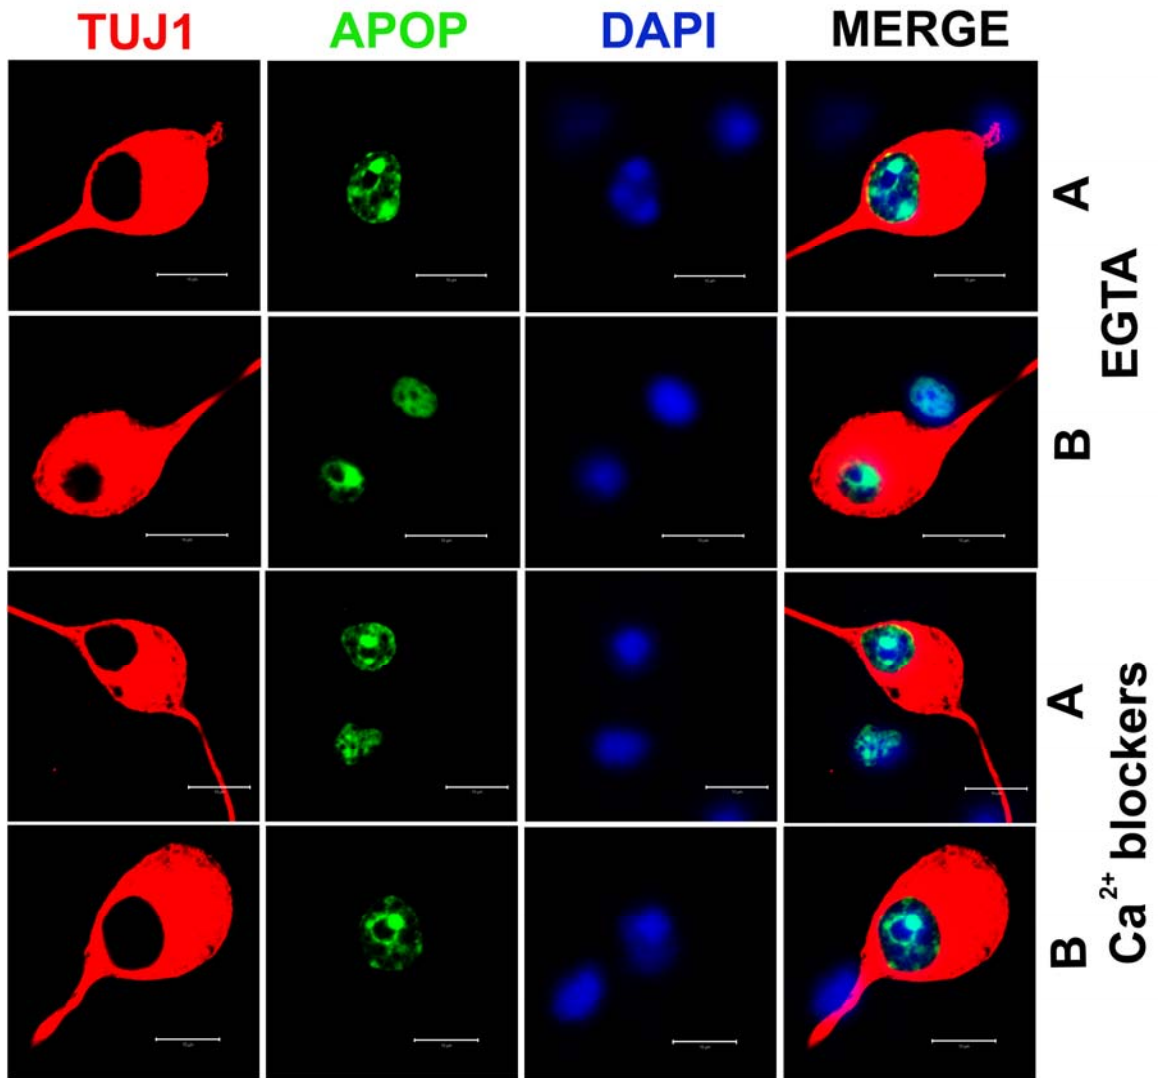

Supplementary Table S1-8

Table S1

Changes in action potential waveforms at different ages

| Apex                                 | 2 week old<br>(n = 11) | 3-4 month old (n<br>= 12) | 17 month old (n<br>= 9) |
|--------------------------------------|------------------------|---------------------------|-------------------------|
| Rmp (mV)                             | -63 ± 4                | -65 ± 2                   | -60 ± 3#                |
| Threshold (mV)                       | -44 ± 3                | -39 ± 2**                 | -35 ± 2**##             |
| AP (duration) (ms)                   | 8 ± 2                  | 6 ± 1**                   | 6 ± 0*                  |
| Latency (ms)                         | 5 ± 1                  | 3 ± 0**                   | 4 ± 1*                  |
| Max depolarization. slope<br>(mV/ms) | 104 ± 38               | 136 ± 26                  | 118 ± 20                |
| Max repolarization slope<br>(mV/ms)  | -54 ± 18               | -75 ± 16*                 | -68 ± 15                |
| Half width (ms)                      | 0.5 ± 0.2              | 0.5 ± 0.1                 | 0.6 ± 0.1               |

\*\*p<0.01, \*p<0.05 vs 2 week

##p<0.01,#p<0.05 vs 3-4 month

Rmp = Resting membrane potential; Max = Maximum, AP = action potential

# Functional mechanisms of progressive hearing loss

Table S2

| Base                                | 2 week (0.5 months)<br>old (n = 9) | 3-4 month old (n<br>= 7) | 17 month old (n<br>= 7) |
|-------------------------------------|------------------------------------|--------------------------|-------------------------|
| Rmp (mV)                            | -57 ± 2                            | -60 ± 4                  | -54 ± 3*#               |
| Threshold (mV)                      | -40 ± 2                            | -38 ± 1                  | -35 ± 3.0** #           |
| Spike number                        | 43 ± 10                            | 18 ± 5**                 | 34 ± 7*##               |
| AP duration (ms)                    | 6 ± 1                              | 8 ± 2*                   | 8 ± 1**                 |
| Latency (ms)                        | 4 ± 1                              | 6 ± 1*                   | 5 ± 1*                  |
| Max depolarization slope<br>(mV/ms) | 177 ± 40                           | 164 ± 36                 | 129 ± 17*#              |
| Max repolarization slope<br>(mV/ms) | -123 ± 26                          | -107 ± 26                | -90 ± 21*               |
| Half Width (ms)                     | 0.6 ± 0.1                          | 0.7 ± 0.1                | 0.7 ± 0.2*              |

\*\*p<0.01, \*p<0.05 *versus* 2 week

##p<0.01, # p<0.05 *versus* 3-4 month

Rmp = Resting membrane potential; Max = Maximum, AP = action potential

## Functional mechanisms of progressive hearing loss

Table S3

The effect of linopirdine on action potentials

| 2 week (0.5 month) old mice | Base (n = 11) |                | Apex (n = 12)  |                |
|-----------------------------|---------------|----------------|----------------|----------------|
|                             | Linopirdine   |                | Linopirdine    |                |
|                             | Control       | (10 $\mu$ M)   | Control        | (10 $\mu$ M)   |
| Spike number                | 40 $\pm$ 13   | 47 $\pm$ 6     | 1 $\pm$ 0      | 1 $\pm$ 0      |
| Rmp (mV)                    | -62 $\pm$ 3   | -53 $\pm$ 3*   | -63 $\pm$ 4    | -57 $\pm$ 3    |
| Threshold(mV)               | -39 $\pm$ 3   | -38 $\pm$ 3    | -43 $\pm$ 3    | -43 $\pm$ 2    |
| AP duration (ms)            | 7 $\pm$ 1     | 6 $\pm$ 1      | 9 $\pm$ 2      | 7 $\pm$ 1      |
| Latency (ms)                | 5 $\pm$ 1     | 4 $\pm$ 1*     | 5 $\pm$ 1      | 4 $\pm$ 1*     |
| Max depolarization slope    |               |                |                |                |
| (mV/ms)                     | 180 $\pm$ 48  | 156 $\pm$ 55   | 105 $\pm$ 42   | 95 $\pm$ 12    |
| Max repolarization slope    |               |                |                |                |
| (mV/ms)                     | -125 $\pm$ 36 | -105 $\pm$ 40  | -52 $\pm$ 19   | -49 $\pm$ 8    |
| Half width (ms)             | 0.6 $\pm$ 0.1 | 0.66 $\pm$ 0.2 | 0.55 $\pm$ 0.1 | 0.61 $\pm$ 0.1 |

Rmp = Resting membrane potential; Max = Maximum, AP = action potential

\*p<0.05, \*\*p<0.01 Treatment *versus* control

# Functional mechanisms of progressive hearing loss

Table S4

| 3-4 month old mice       | Base (n = 9)  |               | Apex (n = 8)    |                |
|--------------------------|---------------|---------------|-----------------|----------------|
|                          | Linopirdine   |               | Linopirdine (10 |                |
|                          | Control       | (10 $\mu$ M)  | Control         | $\mu$ M)       |
| Spike number             | 19 $\pm$ 5    | 40 $\pm$ 7 ** | 1 $\pm$ 0       | 1 $\pm$ 0      |
| Rmp (mV)                 | -57 $\pm$ 4   | -51 $\pm$ 3*  | -63 $\pm$ 4     | -60 $\pm$ 4    |
| Threshold (mV)           | -40 $\pm$ 2   | -39 $\pm$ 3   | -39 $\pm$ 2     | -37 $\pm$ 4    |
| AP duration (ms)         | 8 $\pm$ 2     | 7 $\pm$ 2     | 6 $\pm$ 1       | 6 $\pm$ 1      |
| Latency (ms)             | 5 $\pm$ 2     | 5 $\pm$ 1     | 3 $\pm$ 0       | 3 $\pm$ 0      |
| Max depolarization slope |               |               |                 |                |
| (mV/ms)                  | 182 $\pm$ 46  | 119 $\pm$ 49  | 136 $\pm$ 26    | 79 $\pm$ 26**  |
| Max repolarization slope |               |               |                 |                |
| (mV/ms)                  | -121 $\pm$ 39 | -79 $\pm$ 32  | -75 $\pm$ 16    | -45 $\pm$ 16** |
| Half width (ms)          | 0.6 $\pm$ 0.2 | 0.7 $\pm$ 0.3 | 0.5 $\pm$ 0.1   | 0.6 $\pm$ 0.2  |

Rmp = Resting membrane potential; Max = Maximum, AP = action potential

\*p<0.05, \*\*p<0.01 Treatment *versus* control

Functional mechanisms of progressive hearing loss

Table S5

| 17 month old mice        | Base (n = 5) |               | Apex (n = 6)    |               |
|--------------------------|--------------|---------------|-----------------|---------------|
|                          | Linopirdine  |               | Linopirdine (10 |               |
|                          | Control      | (10 $\mu$ M)  | Control         | $\mu$ M)      |
| Spike number             | 22 $\pm$ 7   | 38 $\pm$ 7 ** | 1 $\pm$ 0       | 1 $\pm$ 0     |
| Rmp (mV)                 | -54 $\pm$ 4  | -44 $\pm$ 4*  | -60 $\pm$ 4     | -60 $\pm$ 4   |
| Threshold (mV)           | -37 $\pm$ 4  | -35 $\pm$ 5   | -36 $\pm$ 2     | -34 $\pm$ 4   |
| AP duration (ms)         | 7 $\pm$ 0    | 6 $\pm$ 2     | 6 $\pm$ 1       | 6 $\pm$ 1     |
| Latency (ms)             | 5 $\pm$ 1    | 4 $\pm$ 2     | 4 $\pm$ 0       | 3 $\pm$ 0     |
| Max depolarization slope |              |               |                 |               |
| (mV/ms)                  | 134 $\pm$ 13 | 177 $\pm$ 46  | 139 $\pm$ 26    | 82 $\pm$ 26*  |
| Max repolarization slope |              |               |                 |               |
| (mV/ms)                  | -99 $\pm$ 8  | -129 $\pm$ 40 | -89 $\pm$ 16    | -65 $\pm$ 16* |
| Half width (ms)          | 0.6 $\pm$ 0  | 0.6 $\pm$ 0   | 0.5 $\pm$ 0.1   | 0.6 $\pm$ 0.2 |

Rmp = Resting membrane potential; Max = Maximum, AP = action potential

\*p<0.05, \*\*p<0.01 Treatment *versus* control

# Functional mechanisms of progressive hearing loss

Table S6

The effect of retigabine on action potentials

| 2 week (0.5 month) old mice         |                |                 |               |                     |
|-------------------------------------|----------------|-----------------|---------------|---------------------|
|                                     | Base (n = 4)   |                 | Apex (n = 5)  |                     |
|                                     | Retigabine (10 |                 | Retigabine    |                     |
|                                     | Control        | $\mu\text{M}$ ) | Control       | (10 $\mu\text{M}$ ) |
| Spike number                        | 29 $\pm$ 12    | 2 $\pm$ 1       | 1 $\pm$ 0     | 0**                 |
| Rmp (mV)                            | -58 $\pm$ 2    | -64 $\pm$ 1*    | -66 $\pm$ 4   | -75 $\pm$ 5*        |
| Threshold (mV)                      | -40 $\pm$ 2    | -40 $\pm$ 1     | -39 $\pm$ 3   | -                   |
| AP duration (ms)                    | 7 $\pm$ 1      | 6 $\pm$ 3       | 6 $\pm$ 2     | -                   |
| Latency (ms)                        | 4 $\pm$ 0      | -               | 4 $\pm$ 1     | -                   |
| Max depolarization slope<br>(mV/ms) | 166 $\pm$ 33   | -               | 131 $\pm$ 109 | -                   |
| Max repolarization slope<br>(mV/ms) | -104 $\pm$ 41  | -               | -85 $\pm$ 42  | -                   |
| Half width (ms)                     | 0.7 $\pm$ 0.2  | -               | 0.6 $\pm$ 0.2 | -                   |

Rmp = Resting membrane potential; Max = Maximum, AP = action potential

\*p<0.05, \*\*p<0.01 Treatment *versus* control



## Functional mechanisms of progressive hearing loss

Table S7  
3-4 month old mice

|                          | Base (n = 7)  |                         | Apex (n = 8)  |                         |
|--------------------------|---------------|-------------------------|---------------|-------------------------|
|                          | Control       | Retigabine (10 $\mu$ M) | Control       | Retigabine (10 $\mu$ M) |
| Spike number             | 20 $\pm$ 6    | 0.4 $\pm$ 0.5**         | 1 $\pm$ 0     | 0**                     |
| Rmp (mV)                 | -59 $\pm$ 3   | -66 $\pm$ 3 *           | -62 $\pm$ 2   | -66 $\pm$ 3             |
| Threshold (mV)           | -37 $\pm$ 3   | -                       | -42 $\pm$ 3   | -                       |
| AP duration (ms)         | 8 $\pm$ 2     | -                       | 8 $\pm$ 1     | -                       |
| Latency (ms)             | 5 $\pm$ 2     | -                       | 6 $\pm$ 2     | -                       |
| Max depolarization.      |               |                         |               |                         |
| Slope (mV/ms)            | 152 $\pm$ 37  | -                       | 125 $\pm$ 31  | -                       |
| Max repolarization slope |               |                         |               |                         |
| (mV/ms)                  | -94 $\pm$ 27  | -                       | -71 $\pm$ 39  | -                       |
| Half Width (ms)          | 0.7 $\pm$ 0.2 | -                       | 0.8 $\pm$ 0.5 | -                       |

Rmp = Resting membrane potential; Max = Maximum, AP = action potential

\*p<0.05, \*\*p<0.01 Treatment *versus* control

Functional mechanisms of progressive hearing loss

Table S8

17 month old mice

|                          | Base (n = 5)   |                 | Apex (n = 6)   |                 |
|--------------------------|----------------|-----------------|----------------|-----------------|
|                          | Retigabine (10 |                 | Retigabine (10 |                 |
|                          | Control        | $\mu\text{M}$ ) | Control        | $\mu\text{M}$ ) |
| Spike number             | $22 \pm 6$     | $1 \pm 1^{**}$  | $1 \pm 0$      | $0^{**}$        |
| Rmp (mV)                 | $-59 \pm 3$    | $-69 \pm 2^*$   | $-61 \pm 2$    | $-67 \pm 2^*$   |
| Threshold (mV)           | $-37 \pm 3$    | -               | $-42 \pm 3$    | -               |
| AP duration (ms)         | $6 \pm 2$      | -               | $7 \pm 1$      | -               |
| Latency (ms)             | $3 \pm 1$      | -               | $5 \pm 2$      | -               |
| Max depolarization.      |                |                 |                |                 |
| Slope (mV/ms)            | $89 \pm 37$    | -               | $125 \pm 31$   | -               |
| Max repolarization slope |                |                 |                |                 |
| (mV/ms)                  | $-93 \pm 17$   | -               | $-71 \pm 39$   | -               |
| Half Width (ms)          | $0.4 \pm 0.2$  | -               | $0.5 \pm 0.2$  | -               |

Rmp = Resting membrane potential; Max = Maximum, AP = action potential

\* $p < 0.05$ , \*\* $p < 0.01$  Treatment *versus* control
